# Supplementary material
Source: PubMed Central journal article supplement (PMC8577342)
Supplement: mmc1.pdf [file mmc1.pdf]

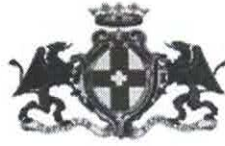

**OSPEDALE POLICLINICO SAN MARTINO**

Sistema Sanitario Regione Liguria

*Istituto di Ricovero e Cura a Carattere Scientifico*

June 30th, 2021

To whom it may concern:

We express our agreement to be acknowledged in the Acknowledgments section of the paper: "Effect of SARS-CoV-2 mRNA vaccination in MS patients treated with disease modifying therapies".

Barbara Uggeri

Laboratory Medicine,  
IRCCS Osp.Policlinico San Martino,  
Genova, Italy

Claudio Spallarossa

Laboratory Medicine,  
IRCCS Osp.Policlinico San Martino,  
Genova, Italy

Giovanni Rossi

Laboratory Medicine,  
IRCCS Osp.Policlinico San Martino,  
Genova, Italy
